# Supplementary material
Source: publisher figshare collection journal article supplement (https://gsajournals.figshare.com/ndownloader/files/13991159)
Supplement: Supplementary file 1 [file 13991159]

## Sheet: TableS8
Table S8 Evaluation of gene space coverage using core eukaryotic gene mapping approach (CEGMA).
Category	Number
Total KOGs	245
KOGs align one gene	222
KOGs align no gene	22
